# Supplementary material for: Interactions between Bacillus anthracis and Plants May Promote Anthrax Transmission
Source: PubMed Central journal article supplement (PMC4046938; doi:10.1371/journal.pntd.0002903), 2014-06-05

a.

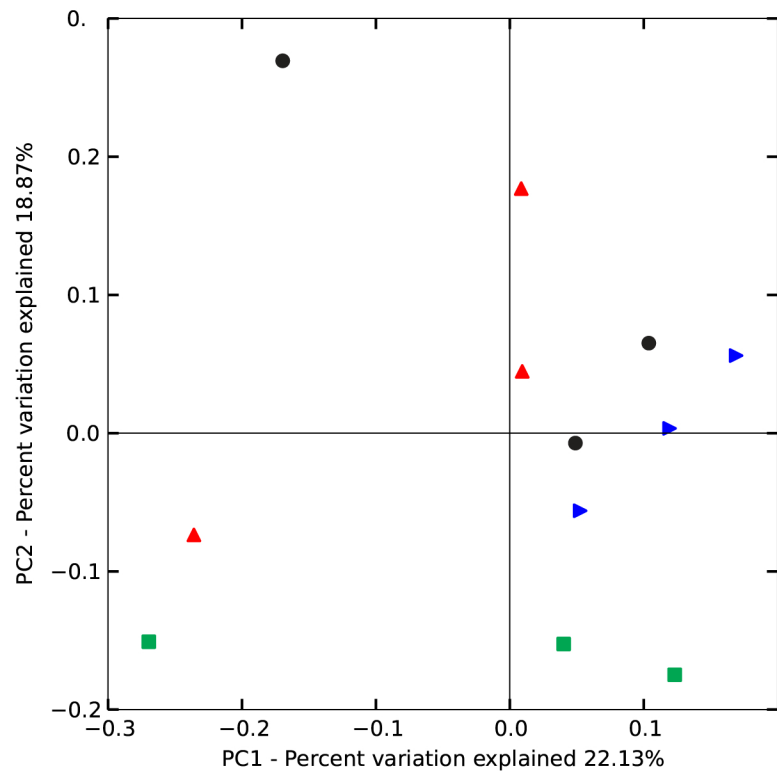

b.

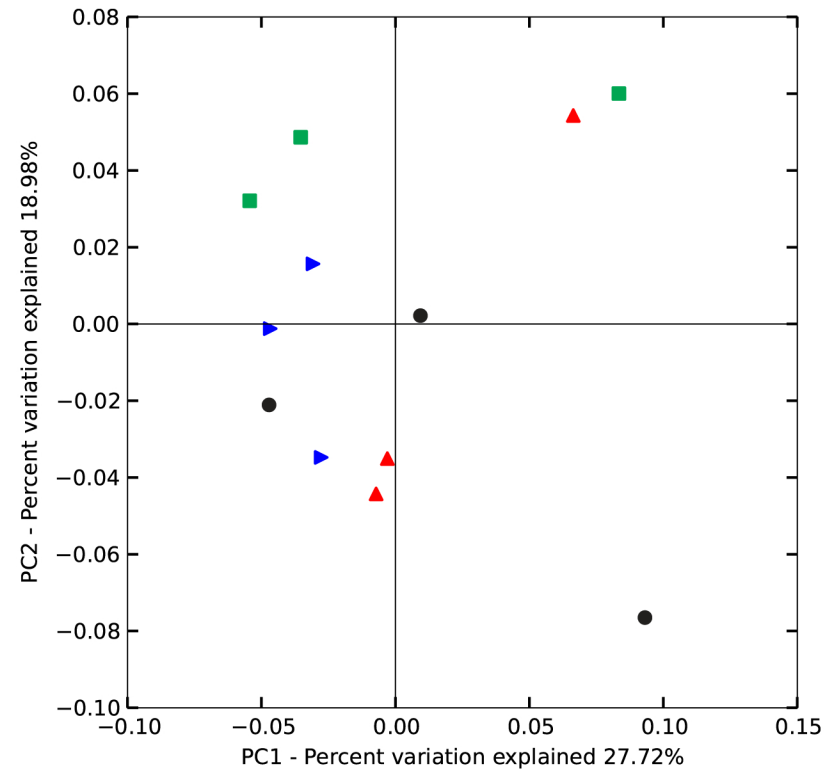

Supplement: pntd.0002903.s001.pdf [file pntd.0002903.s001.pdf]
